# Supplementary material for: Temperature regimes shape similarity of life-history strategies between native and non-native freshwater fishes
Source: Research Square preprint supplement (doi:10.21203/rs.3.rs-8586370/v1), 2026-01-19
Supplement: Supplementary file 1 [file 48451c548091346459375cac.docx]

**Supplementary Information for**

**Temperature regimes shape similarity of life-history strategies between native and non-native freshwater fishes**

**Supplementary Figures**


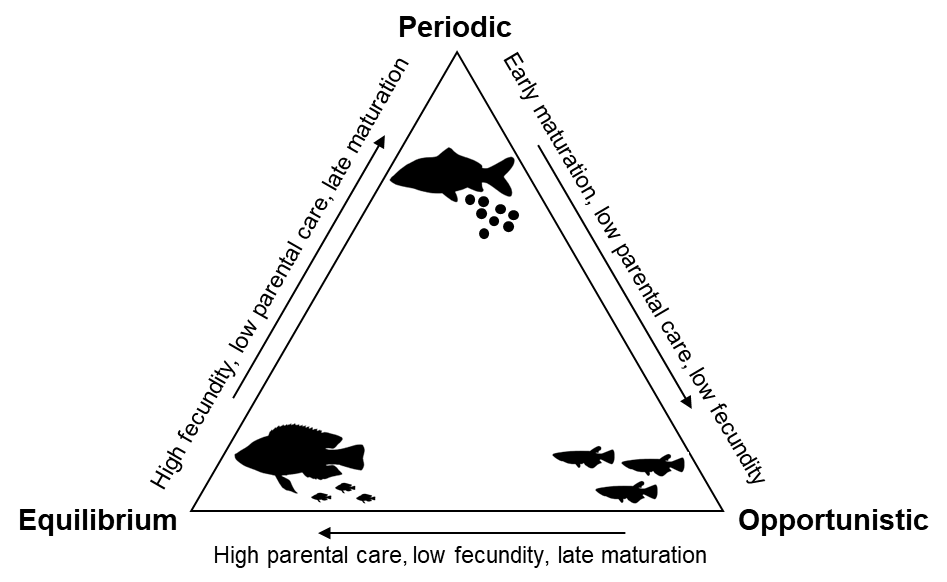


**Fig. S1. Conceptual figure describing the typical traits of three life-history strategies of freshwater fish species**. The EPO model classifies fish life-history strategies into three adaptive types based on trade-offs among juvenile survival, fecundity, and generation time in response to environmental regimes. Equilibrium strategists occur in stable environments and have intermediate body size, low fecundity, late maturation, and high parental investment. Periodic strategists dominate in seasonal environments and are typically large-bodied, high fecundity, and late maturation with low parental care. Opportunistic strategists prevail in frequently disturbed systems and are small-bodied, short-lived, early maturation, low parental care, low fecundity, and rely on rapid population turnover.


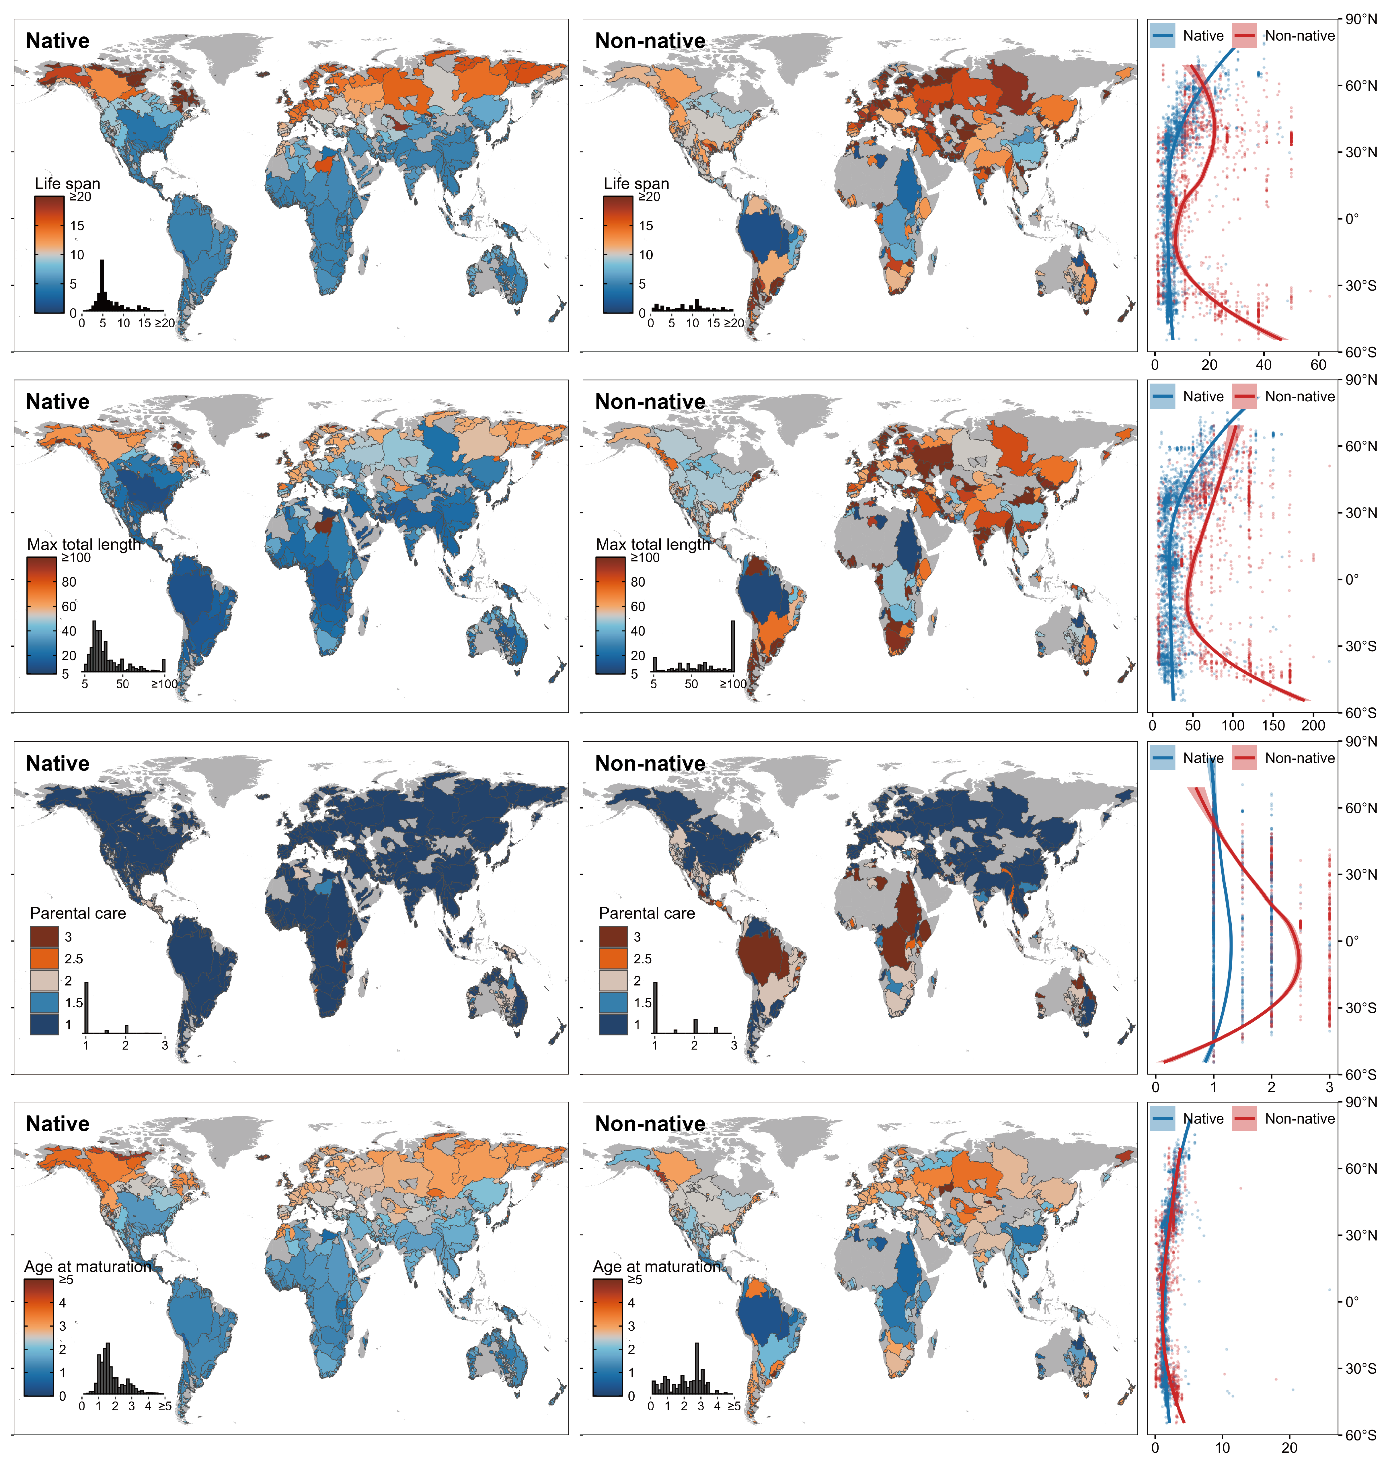


**Fig. S2. Global distributions and latitudinal trends in median values of four life-history traits (life span, maximum total length, parental care, and age at maturation) of native and non-native freshwater fishes at the river-basin scale.** Curves in the right-hand panels represent the corresponding fitted latitudinal trends for native and non-native fishes based on LOESS smoothing. All error bands represent 95% confidence intervals.


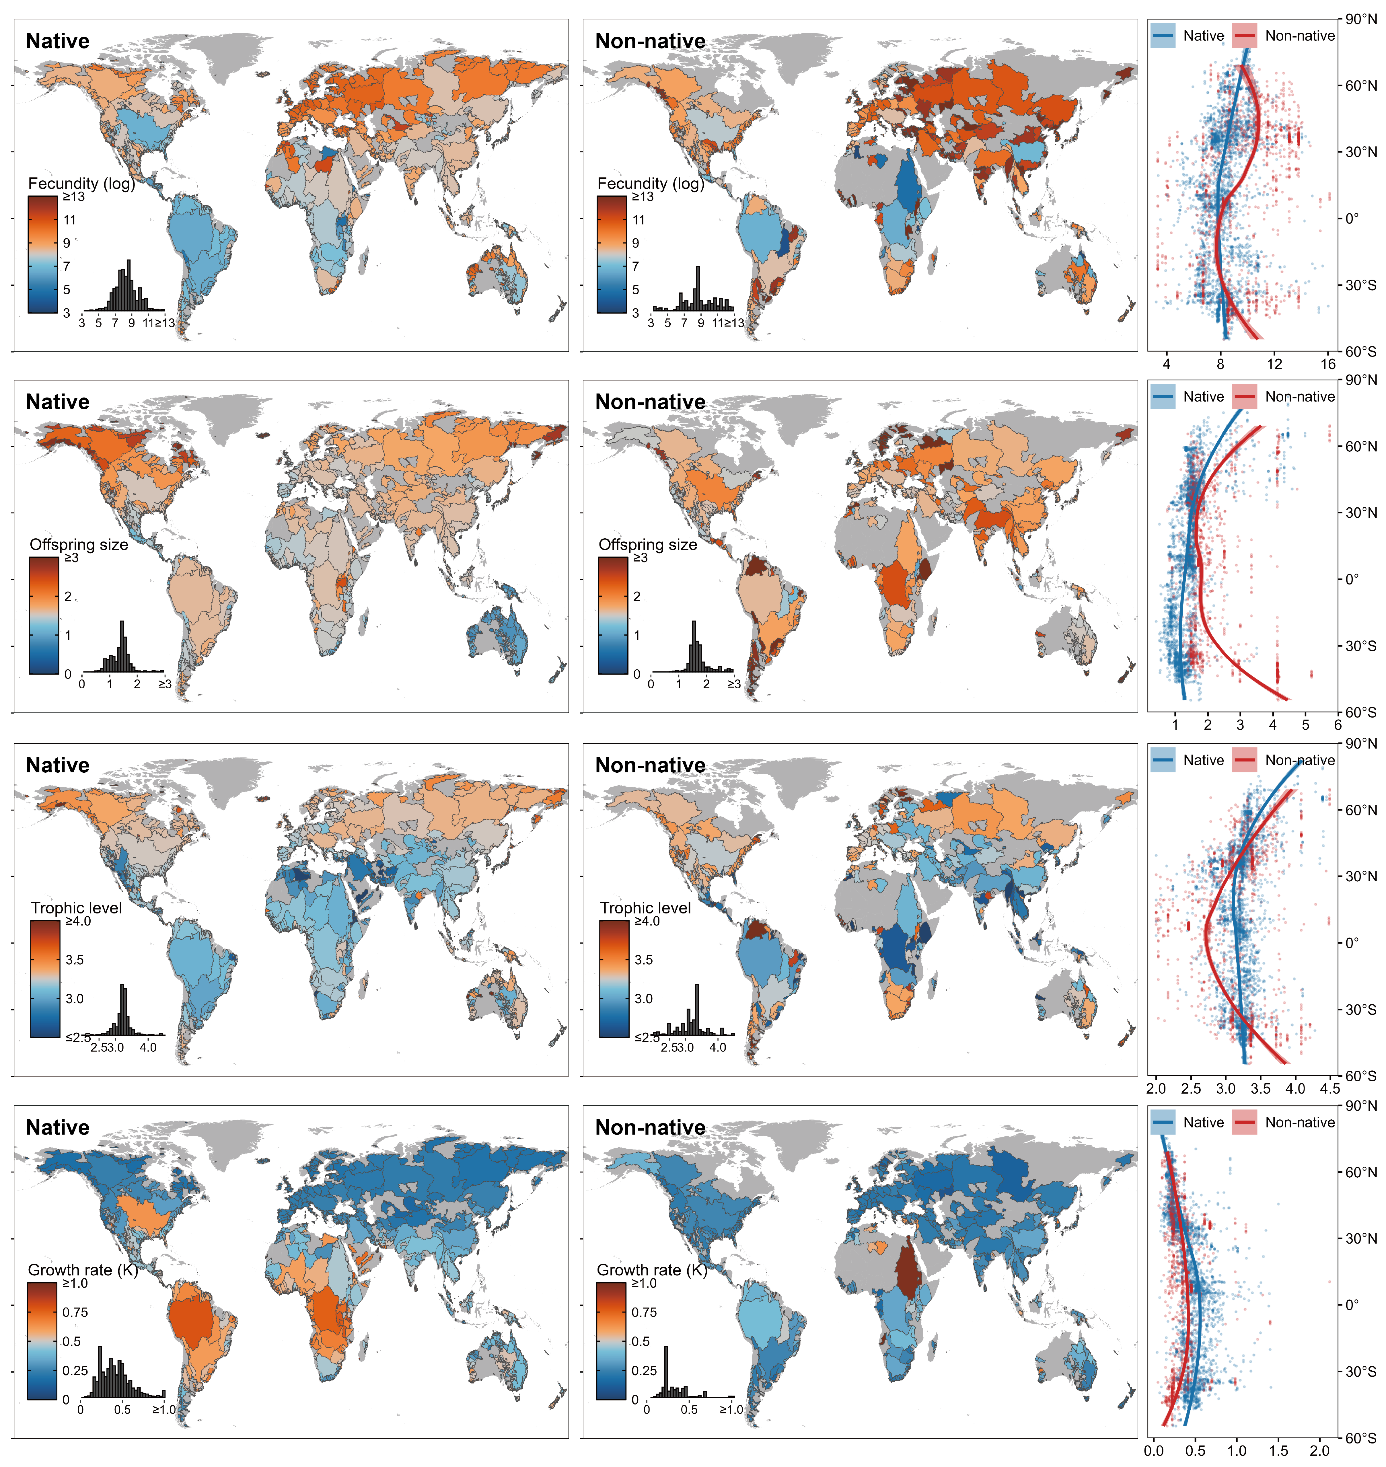


**Fig. S3.** **Global distributions and latitudinal trends in median values of another four life-history traits (fecundity, offspring size, trophic level, and K) of native and non-native freshwater fishes at the river-basin scale.** Curves in the right-hand panels represent the corresponding fitted latitudinal trends for native and non-native fishes based on LOESS smoothing. All error bands represent 95% confidence intervals.


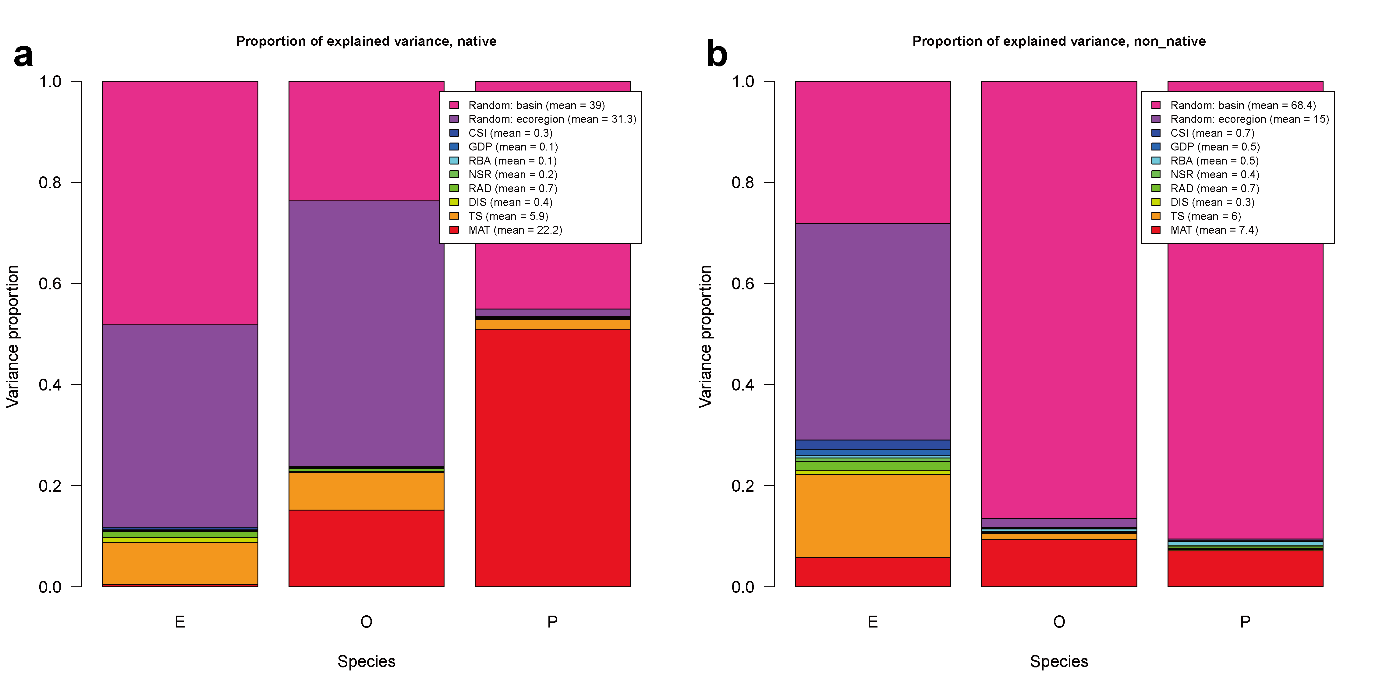


**Fig. S4. Partitioning of the overall explained variance of the data into the different model components.** (**a**) Native fish. (**b**) Non-native fish. E, equilibrium; O, opportunistic; P, periodic.


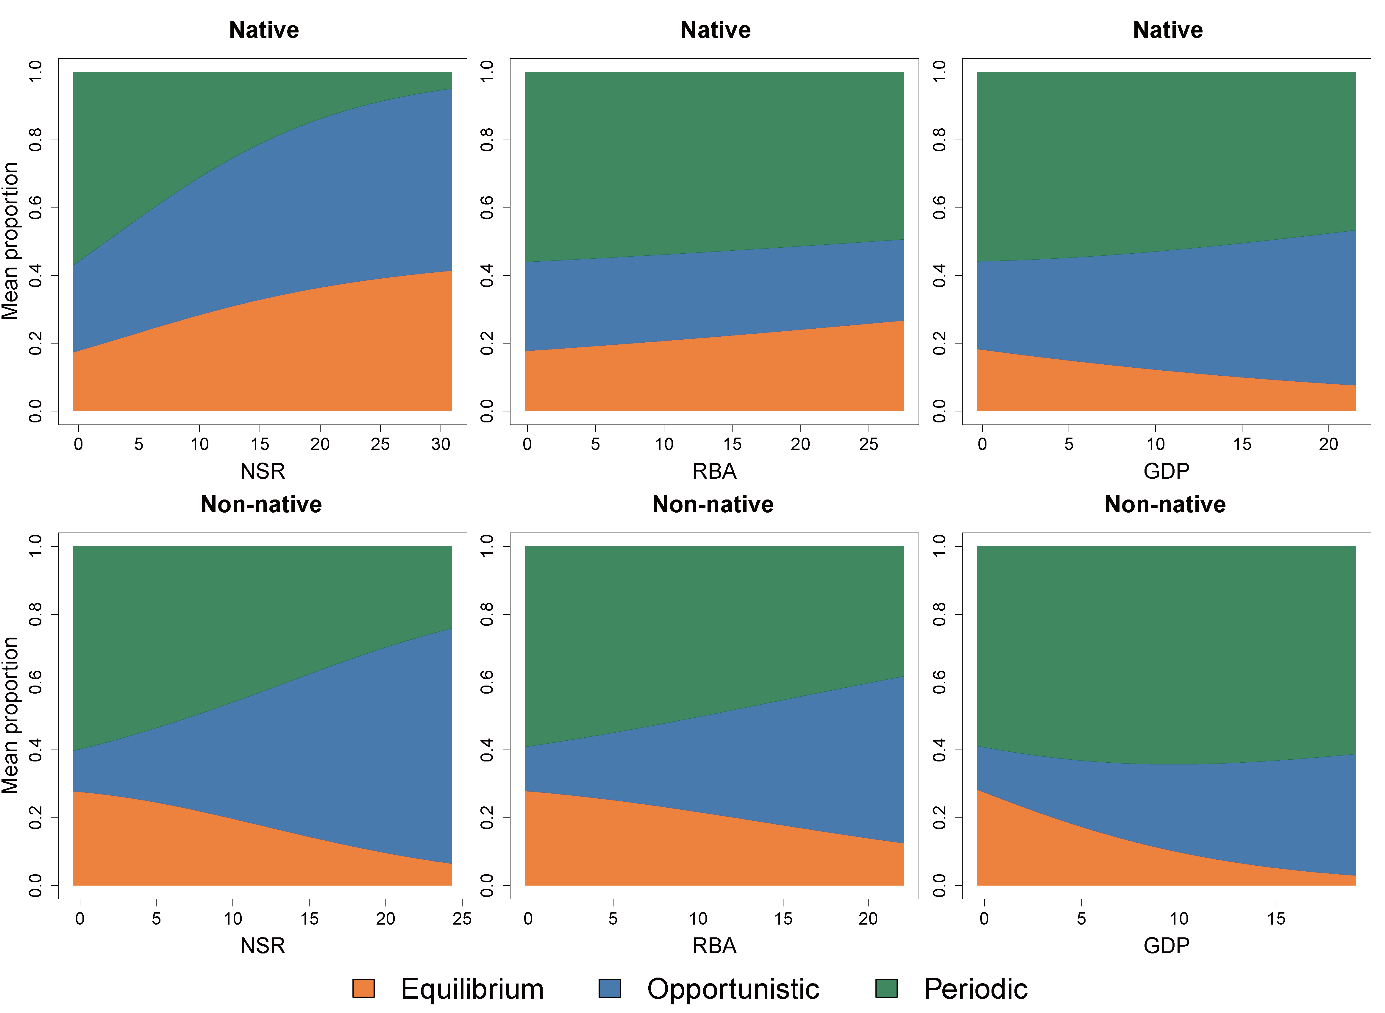


**Fig. S5. Effect of environmental and anthropogenic covariates on the three life-history strategies in global native and non-native fishes.** NSR, native species richness; RBA, river basin area; GDP, gross domestic product.


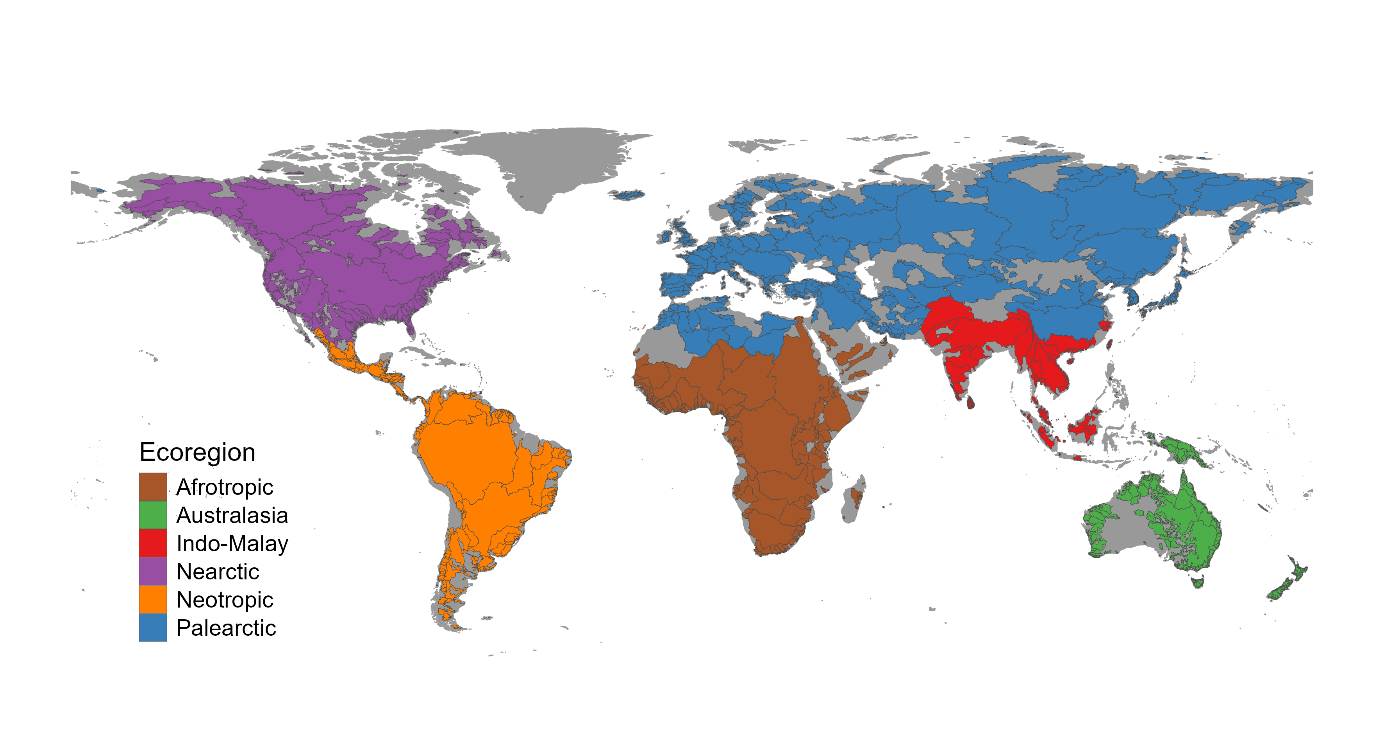


**Fig. S6. Global distribution of the six biogeographical realms.** Oceania was merged with Australasia for analysis in this study.

**
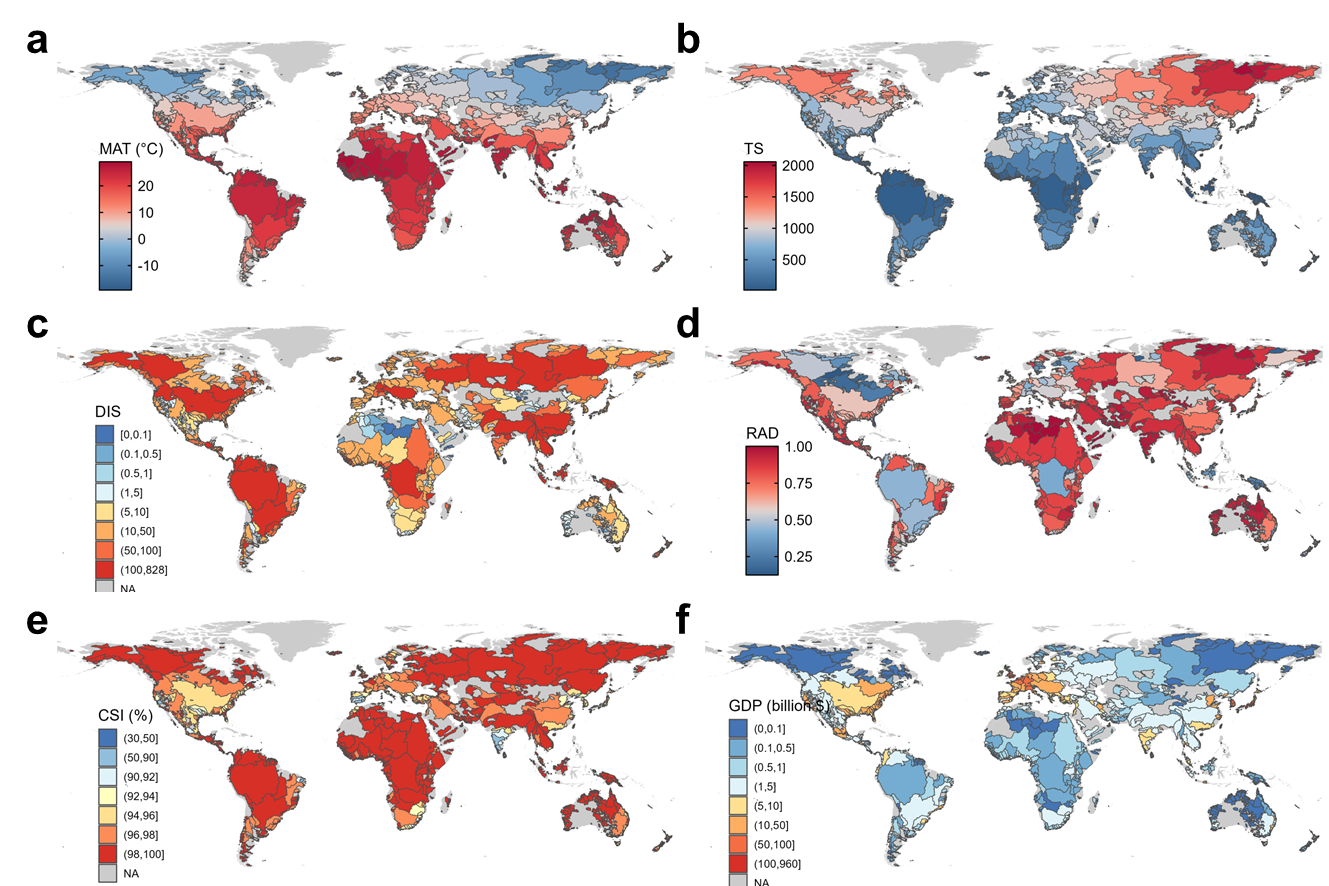
**

**Fig. S7. The main environmental and anthropogenic predictors at the river basin scale.** (**a**) Mean annual temperature (MAT). (**b**) temperature seasonality (TS). (**c**) natural discharge (DIS). (**d**) relative amplitude of natural discharge (RAD). (**e**) connectivity status index of river reaches (CSI). (**f**) gross domestic product (GDP).


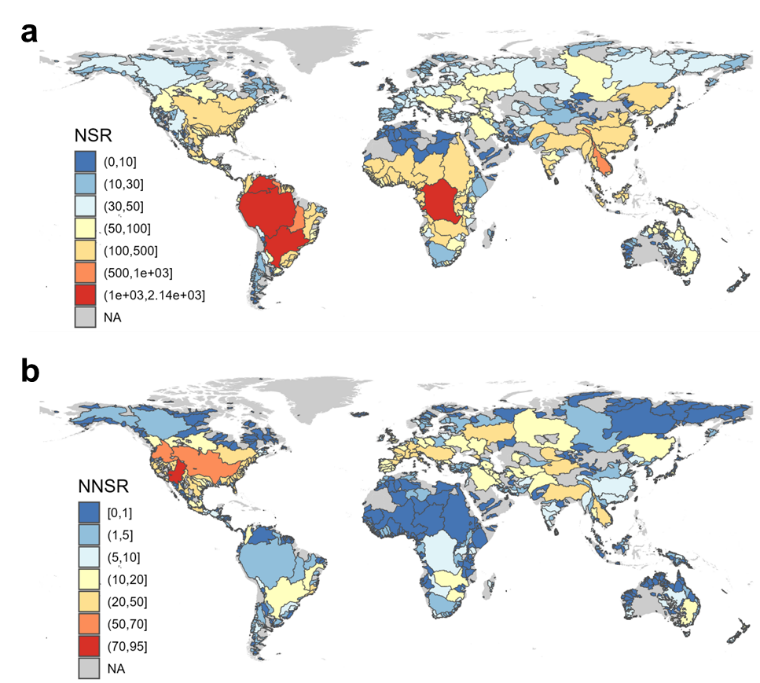


**Fig. S8. Global geographical distribution of native and non-native freshwater fish species across the 3,118 basins.** (**a**) Geographical pattern of native fish richness (NSR). (**b**) Geographical pattern of non-native fish richness (NNSR).


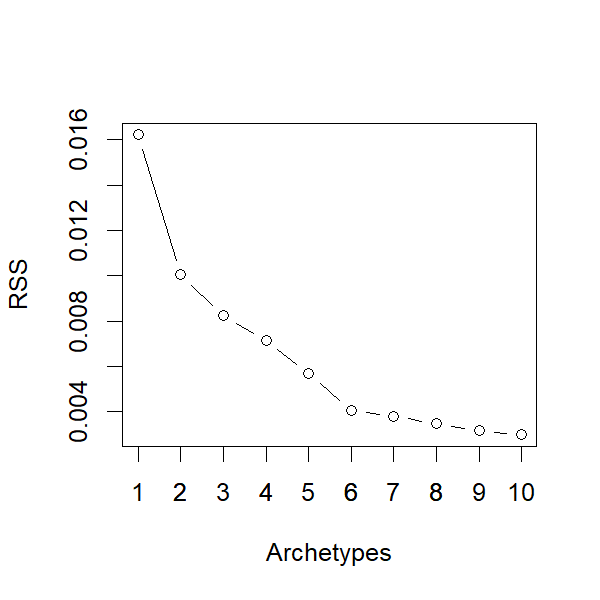


**Fig. S9.** **Residual sum of squares as a function of the number of strategies.** Residuals sum of squares (RSS), i.e. quality of fit, of 10 archetypal analysis iterations as a function of the numbers of extreme points (k) used to encompass the trait space representing the life-history strategies endpoint.


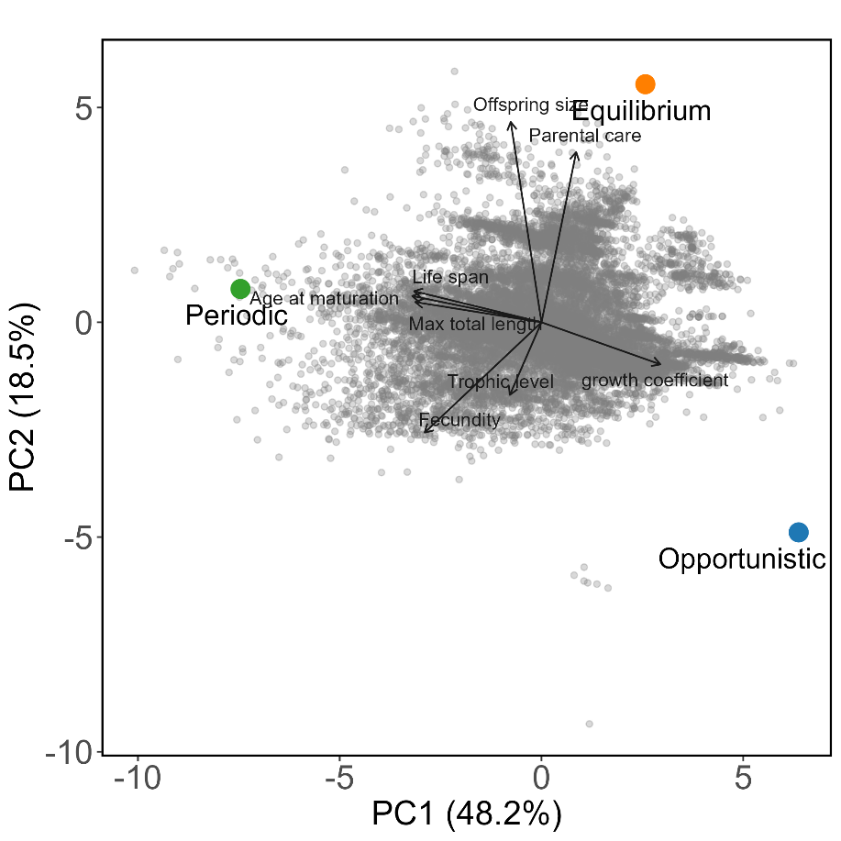


**Fig. S10.** **Principal component analysis (PCA) of the eight life-history traits and life-history strategy endpoints identified based on archetypal analysis (AA).** The proportions of the three life-history strategies for each species add to one.


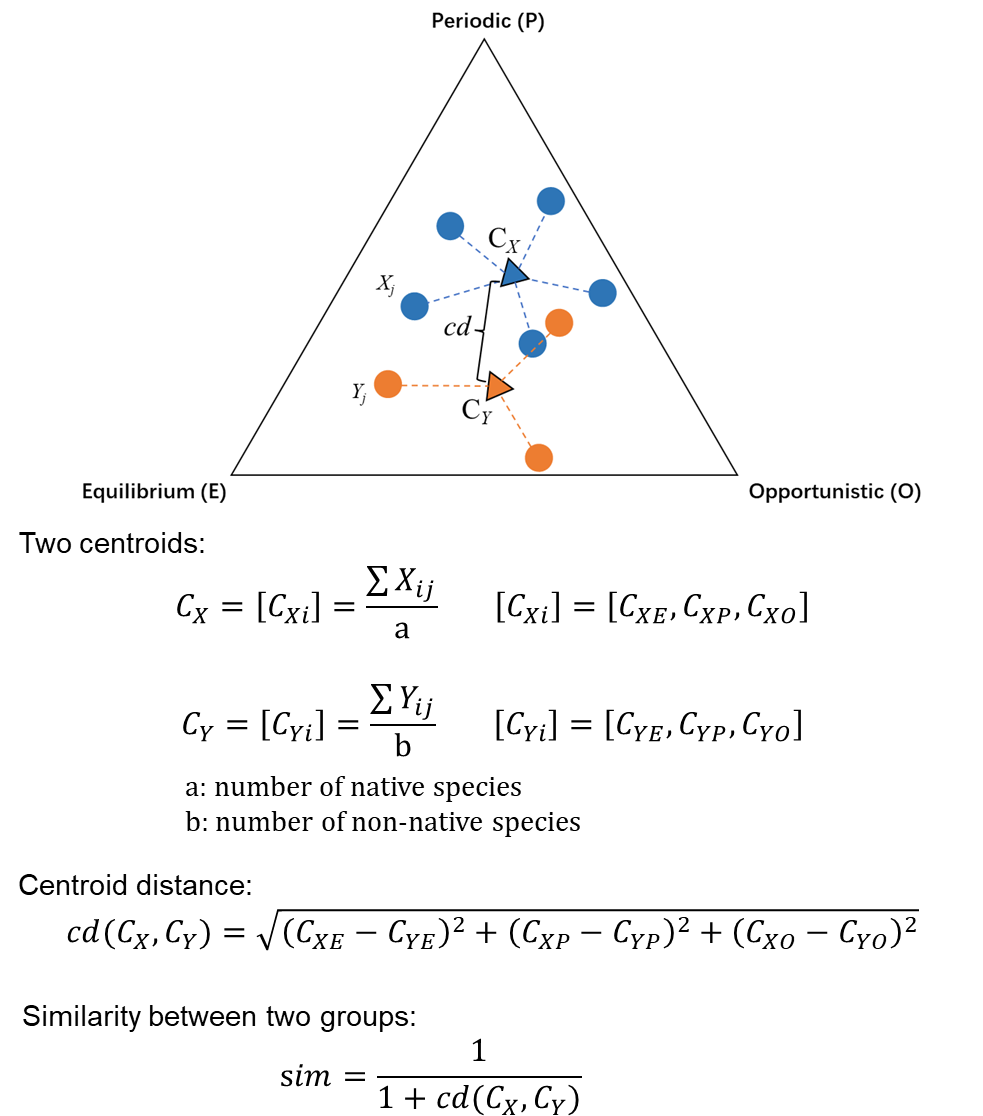


**Fig. S11. An example illustrating the computation of similarity between native and non-native fishes.** The life-history triangle represents the proportions of life-history strategies within each basin, estimated based on the distance of the species to the three end-points of the life-history triangle defined by eight traits: equilibrium (E), opportunistic (O), and periodic (P) strategies. Blue and orange circles denote individual native and non-native species, respectively. Vector *Yj* represents the position of non-native species *j* and vector *Xj* is the position of native species *j*. *CX* and *CY* (triangles) are the centroids of native and non-native fishes, with [*CXi*] and [*CYi*] representing their coordinates in ternary space. *cd* is the distance between the centroids for native (*CX*) and non-native (*CY*) centroids. *sim* is the similarity.


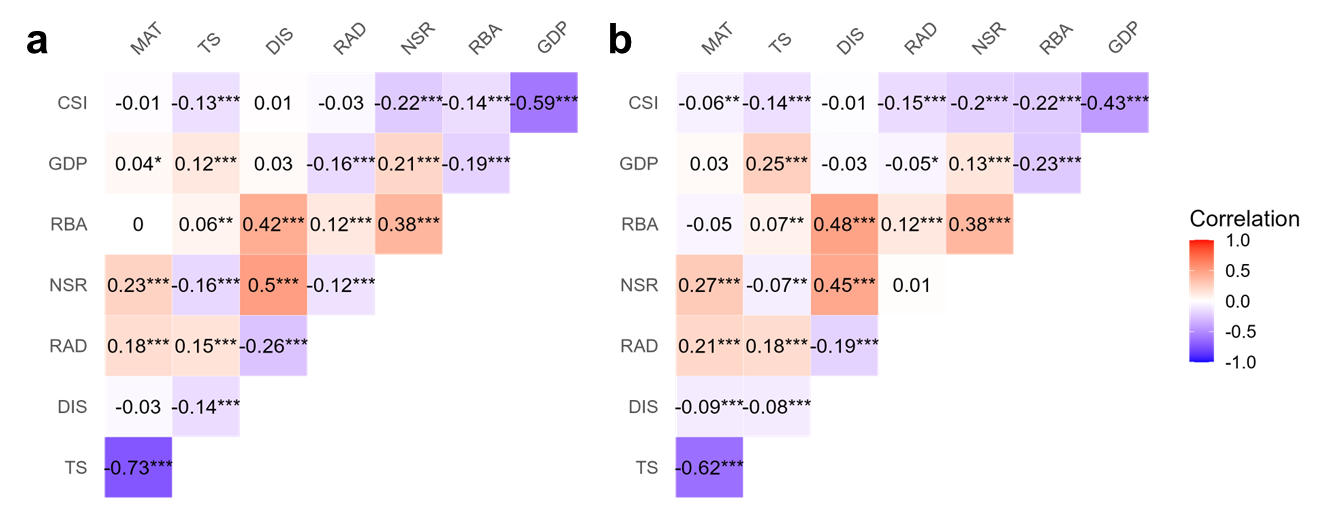


**Fig. S12.** Spearman correlation between the eight environmental and anthropogenic variables of the world river basins. (**a**) Correlations among predictors for the 3,032 basins included in the HMSC model of native life‐history strategy composition. (**b**) Correlations among predictors for the 1,691 basins included in the HMSC model of non‐native life‐history strategy composition. Abbreviations: MAT, mean annual temperature; TS, temperature seasonality; DIS, natural discharge; RAD, relative amplitude of natural discharge; NSR, native species richness; RBA, river basin area; GDP, gross domestic product; CSI, connectivity status index of river reaches. **p* < 0.05; ***p* < 0.01; ****p* < 0.001.

**Supplementary Tables**

**Table S1. Linear regression of basin-level mean life-history strategy proportions against absolute latitude for native and non-native fishes.** Statistically significant *p* values (≤ 0.05) are given in bold.

| Status | Strategy | n | Intercept | slope | *p* |
| --- | --- | --- | --- | --- | --- |
| Native | Equilibrium | 3115 | 0.211 | −0.002 | **< 0.001** |
| Native | Opportunistic | 3115 | 0.418 | −0.004 | **< 0.001** |
| Native | Periodic | 3115 | 0.371 | 0.006 | **< 0.001** |
| Non-native | Equilibrium | 1723 | 0.484 | −0.007 | **< 0.001** |
| Non-native | Opportunistic | 1723 | 0.222 | −0.003 | **< 0.001** |
| Non-native | Periodic | 1723 | 0.293 | 0.010 | **< 0.001** |

**Table S2 Results of Kruskal–Wallis tests of differences in mean life-history strategy proportions among native and non-native fishes at the basin scale across biogeographical realms and globally.** Statistically significant *p* values (≤ 0.05) are given in bold.

| Status | Global/Ecoregion | Strategy1 | Strategy2 | n1; n2 | statistic | *p* |
| --- | --- | --- | --- | --- | --- | --- |
| Native | Global | Equilibrium | Opportunistic | 3115; 3115 | 31.0 | **< 0.001** |
|  | Global | Equilibrium | Periodic |  | 76.9 | **< 0.001** |
|  | Global | Opportunistic | Periodic |  | 45.9 | **< 0.001** |
| Non-native | Global | Equilibrium | Opportunistic | 1723; 1723 | -16.8 | **< 0.001** |
|  | Global | Equilibrium | Periodic |  | 29.4 | **< 0.001** |
|  | Global | Opportunistic | Periodic |  | 46.2 | **< 0.001** |
| Native | Afrotropic | Equilibrium | Opportunistic | 281; 281 | 13.3 | **< 0.001** |
|  | Afrotropic | Equilibrium | Periodic |  | 19.6 | **< 0.001** |
|  | Afrotropic | Opportunistic | Periodic |  | 6.2 | **< 0.001** |
|  | Australasia | Equilibrium | Opportunistic | 742; 742 | 25.6 | **< 0.001** |
|  | Australasia | Equilibrium | Periodic |  | 40.2 | **< 0.001** |
|  | Australasia | Opportunistic | Periodic |  | 14.6 | **< 0.001** |
|  | Indo-Malay | Equilibrium | Opportunistic | 340; 340 | 15.0 | **< 0.001** |
|  | Indo-Malay | Equilibrium | Periodic |  | 29.5 | **< 0.001** |
|  | Indo-Malay | Opportunistic | Periodic |  | 14.5 | **< 0.001** |
|  | Nearctic | Equilibrium | Opportunistic | 296; 296 | -1.3 | 0.186 |
|  | Nearctic | Equilibrium | Periodic |  | 20.1 | **< 0.001** |
|  | Nearctic | Opportunistic | Periodic |  | 21.4 | **< 0.001** |
|  | Neotropic | Equilibrium | Opportunistic | 426; 426 | 10.0 | **< 0.001** |
|  | Neotropic | Equilibrium | Periodic |  | 20.8 | **< 0.001** |
|  | Neotropic | Opportunistic | Periodic |  | 10.8 | **< 0.001** |
|  | Palearctic | Equilibrium | Opportunistic | 1030; 1030 | 8.7 | **< 0.001** |
|  | Palearctic | Equilibrium | Periodic |  | 43.4 | **< 0.001** |
|  | Palearctic | Opportunistic | Periodic |  | 34.7 | **< 0.001** |
| Non-native | Afrotropic | Equilibrium | Opportunistic | 100; 100 | -6.8 | **< 0.001** |
|  | Afrotropic | Equilibrium | Periodic |  | 4.6 | **< 0.001** |
|  | Afrotropic | Opportunistic | Periodic |  | 11.5 | **< 0.001** |
|  | Australasia | Equilibrium | Opportunistic | 403; 403 | -9.0 | **< 0.001** |
|  | Australasia | Equilibrium | Periodic |  | 8.5 | **< 0.001** |
|  | Australasia | Opportunistic | Periodic |  | 17.5 | **< 0.001** |
|  | Indo-Malay | Equilibrium | Opportunistic | 237; 237 | -13.5 | **< 0.001** |
|  | Indo-Malay | Equilibrium | Periodic |  | 2.6 | **< 0.001** |
|  | Indo-Malay | Opportunistic | Periodic |  | 16.1 | **< 0.001** |
|  | Nearctic | Equilibrium | Opportunistic | 164; 164 | -5.9 | **< 0.001** |
|  | Nearctic | Equilibrium | Periodic |  | 11.2 | **< 0.001** |
|  | Nearctic | Opportunistic | Periodic |  | 17.1 | **< 0.001** |
|  | Neotropic | Equilibrium | Opportunistic | 169; 169 | -9.3 | **< 0.001** |
|  | Neotropic | Equilibrium | Periodic |  | 2.1 | **< 0.05** |
|  | Neotropic | Opportunistic | Periodic |  | 11.4 | **< 0.001** |
|  | Palearctic | Equilibrium | Opportunistic | 650; 650 | -5.3 | **< 0.001** |
|  | Palearctic | Equilibrium | Periodic |  | 26.4 | **< 0.001** |
|  | Palearctic | Opportunistic | Periodic |  | 31.7 | **< 0.001** |

**Table S3.** **Results of Wilcoxon rank sum tests of differences in mean life-history strategy composition between native and non-native fishes at the basin scale across biogeographical realms and globally.** Statistically significant *p* values (≤ 0.05) are given in bold.

| Global/Ecoregion | Life-history strategy | | | | | | | | |
| --- | --- | --- | --- | --- | --- | --- | --- | --- | --- |
| Equilibrium | | | Opportunistic | | | Periodic | | |
| n (native; non-native) | statistic | *p* | n (native; non-native) | statistic | *p* | n (native; non-native) | statistic | *p* |

| Global | (3115;1723) | 1995053 | **< 0.001** | (3115;1723) | 4416154 | **< 0.001** | (3115;1723) | 1946265 | **< 0.001** |
| --- | --- | --- | --- | --- | --- | --- | --- | --- | --- |
| Afrotropic | (281; 100) | 8754 | **< 0.001** | (281; 100) | 26179 | **< 0.001** | (281; 100) | 9611 | **< 0.001** |
| Australasia | (742; 403) | 35733 | **< 0.001** | (742; 403) | 248267 | **< 0.001** | (742; 403) | 110682 | **< 0.001** |
| Indo-Malay | (340; 237) | 13099 | **< 0.001** | (340; 237) | 74818 | **< 0.001** | (340; 237) | 51593 | **< 0.001** |
| Nearctic | (296; 164) | 27137 | **< 0.05** | (296; 164) | 34418 | **< 0.001** | (296; 164) | 16453 | **< 0.001** |
| Neotropic | (426; 169) | 25065 | **< 0.001** | (426; 169) | 62357 | **< 0.001** | (426; 169) | 30345 | **< 0.01** |
| Palearctic | (1030; 650) | 328183 | 0.498 | (1030; 650) | 510221 | **< 0.001** | (1030; 650) | 214787 | **< 0.001** |

**Table S4. Comparison of three generalized linear mixed models examining the effects of environmental and anthropogenic factors on similarity between native and non-native freshwater fishes at basin scale.** Model 1 includes only fixed predictors, whereas Models 2 to 4 additionally incorporate interaction terms. The interaction TS × DIS was excluded from the model 2 to 4 because its variance inflation factor (VIF) exceeded 8; all remaining predictors had VIF < 4. Abbreviations for explanatory variables are MAT: mean annual temperature; TS: temperature seasonality; DIS: natural discharge; RAD: relative amplitude of natural discharge; NSR: native species richness; RBA: river basin area; GDP: gross domestic product; CSI: connectivity status index of river reaches. Statistically significant *p* values (≤ 0.05) are given in bold.

| *Model 1: MAT + TS + DIS + RAD + NSR + RBA + CSI + GDP* | | | | *AIC= −4022.2* |
| --- | --- | --- | --- | --- |
| *Model 2: MAT + TS + DIS + RAD + NSR + RBA + CSI + GDP + MAT*TS + DIS*RAD + MAT*DIS + MAT*RAD + TS*RAD* | | | | *AIC = −4021.0* |
| *Model 3: MAT + TS + DIS + RAD + NSR + RBA + CSI + GDP + DIS*RAD + MAT*DIS + MAT*RAD + TS*RAD* | | | | *AIC = −4021.8* |
| ***Model 4: MAT + TS + DIS + RAD + NSR + RBA + CSI + GDP + MAT*TS + MAT*DIS + MAT*RAD + TS*RAD*** | | | | ***AIC = −4022.5*** |
| Variables | Estimate | SE | *z* | *p* |
| Intercept | 1.177 | 0.097 | 12.158 | **< 0.001** |
| MAT | −0.117 | 0.044 | −2.652 | **< 0.01** |
| TS | 0.137 | 0.063 | 2.177 | **0.029** |
| DIS | 0.032 | 0.022 | 1.448 | 0.148 |
| RAD | −0.037 | 0.022 | −1.687 | 0.092 |
| NSR | 0.082 | 0.024 | 3.416 | **< 0.001** |
| RBA | −0.026 | 0.021 | −1.262 | 0.207 |
| CSI | −0.019 | 0.010 | −1.872 | 0.061 |
| GDP | 0.056 | 0.016 | 3.586 | **< 0.001** |
| MAT × TS | 0.030 | 0.027 | 1.122 | 0.262 |
| MAT × DIS | −0.040 | 0.016 | −2.452 | **0.014** |
| MAT × RAD | −0.035 | 0.027 | −1.306 | 0.191 |
| TS × RAD | −0.040 | 0.028 | −1.444 | 0.149 |
| Number of basins (N = 1691) with all predictors complete | | | | |
| Marginal R2 = 0.22 |  |  |  |  |
| Conditional R2 = 0.99 |  |  |  |  |

**Table S5.** **Percentage of missing values among the eight traits of entire dataset** (*n* = 14,679 species)**.**

| Trait | % missing values |
| --- | --- |
| Life span | 25.19% |
| Fecundity | 25.23% |
| Parental care | 25.60% |
| Age at maturation | 25.23% |
| Offspring size | 25.64% |
| K | 13.21% |
| Maximum total length | 0.00% |
| Trophic level | 0.00% |
| **Average** | **17.51%** |

**Table S6.** **Akaike Information criterion for Brownian motion, Ornstein-Uhlenbeck, Early-Burst and Pagel’s models.**

| Phylogenetic model | AIC | ∆AIC |
| --- | --- | --- |
| Brownian motion | 162298 | 0 |
| Early-Burst | 244875 | 82577 |
| Pagel’s | 285749 | 123451 |
| Ornstein-Uhlenbeck | 36102575 | 35940277 |

**Table S7.** **Comparison of the accuracy of the two approaches used for imputation of the missing species trait values.** Accuracytested by randomly removing and imputing 20% of traits on all species with complete trait information (*n* = 9,691). Accuracy was then assessed via Spearman correlation between imputed and original trait values with the final reported values corresponding to the mean correlation after 100 repetitions. The Brownian motion model was selected as the best phylogenetically informed predictive model, while the average trait method is the classical method of using the average trait value of closely related species (by genera) (see Methods for details).

| Trait | Method | mean R2 | SD | Method | mean R2 | SD |
| --- | --- | --- | --- | --- | --- | --- |
| Life span | Brownian motion model | 0.880 | 0.015 | Average trait | 0.886 | 0.009 |
| Fecundity |  | 0.949 | 0.007 | 0.954 | 0.004 |
| Parental care |  | 0.955 | 0.005 | 0.939 | 0.006 |
| Age at maturation |  | 0.927 | 0.006 | 0.922 | 0.005 |
| Offspring size |  | 0.964 | 0.006 | 0.987 | 0.002 |
| K |  | 0.951 | 0.005 | 0.841 | 0.008 |
| **Average** |  | **0.938** | **0.007** |  | **0.921** | **0.006** |

**Table S8. Results of generalized linear mixed model examining whether the main anthropogenic driver modifies ecological relationships between main environmental factors and the similarity between native and non-native freshwater fishes at the basin scale.** The interaction TS × DIS was excluded from the final models because its variance inflation factor (VIF) exceeded 8; all remaining predictors had VIF < 5. Abbreviations for explanatory variables are MAT: mean annual temperature; TS: temperature seasonality; DIS: natural discharge; RAD: relative amplitude of natural discharge; NSR: native species richness; RBA: river basin area; GDP: gross domestic product; CSI: connectivity status index of river reaches. Statistically significant *p* values (≤ 0.05) are given in bold.

| *Model: MAT + TS + DIS + RAD + NSR + RBA + CSI + GDP + MAT*TS + MAT*DIS + MAT*RAD + TS*RAD + MAT*GDP+ TS*GDP* | | | | *AIC = −4021.3* | |
| --- | --- | --- | --- | --- | --- |
| Variables | Estimate | SE | *z* | | *p* |
| Intercept | 1.179 | 0.097 | 12.151 | | **< 0.001** |
| MAT | −0.132 | 0.045 | -2.950 | | **< 0.01** |
| TS | 0.124 | 0.063 | 1.954 | | 0.051 |
| DIS | 0.032 | 0.022 | 1.424 | | 0.154 |
| RAD | −0.038 | 0.022 | -1.739 | | 0.082 |
| NSR | 0.080 | 0.024 | 3.333 | | **< 0.001** |
| RBA | −0.025 | 0.021 | -1.196 | | 0.232 |
| CSI | −0.020 | 0.010 | -1.984 | | **0.047** |
| GDP | 0.058 | 0.024 | 2.435 | | **0.015** |
| MAT × TS | 0.027 | 0.026 | 1.033 | | 0.302 |
| MAT × DIS | −0.041 | 0.016 | -2.477 | | **0.013** |
| MAT × RAD | −0.037 | 0.027 | -1.357 | | 0.175 |
| TS × RAD | −0.041 | 0.028 | -1.474 | | 0.141 |
| MAT × GDP | −0.075 | 0.050 | -1.519 | | 0.129 |
| TS × GDP | −0.027 | 0.036 | -0.758 | | 0.449 |
